# Supplementary material for: Relationship between the distribution of vegetation and the environment in the coastal embryo dunes of Jalisco, México
Source: PeerJ. 2022 Mar 2;10:e13015. doi: 10.7717/peerj.13015 (PMC8898010; doi:10.7717/peerj.13015)
Supplement: Supplemental Information 5 [file peerj-10-13015-s005.xls]

## Sheet: Relationship plant-soil
Coordinates UTM (Zone 13)			site		Lat Grad	organic matter		electrival conductivity	dry color	wet color	gravel	Very coarse	Coarse	Medium	Fine sand	Very fine	silt+clay	magnetite	moisture retention	Vegetation	distance to	Topoform	Topoform	Lithology	Climate	Plant species presence/absence
x	y	site name	number	order	id	(%)	ph		of soil	of soil	(%)	sand (%)	sand (%)	sand (%)	(%)	sand (%)	(%)	(%)	(%)	coverage (%)	sea (m)	orientation	altitude (m)		Method: Rivas-Martínez	Prosopis juliflora	Canavalia rosea	Abronia maritima	Acalypha monostachya	Ipomoea pes-capreae	Okenia hypogaea	Pectis arenaria	Scaevola plumieri	Distichlis spicata	Jouvea pilosa	Uniola pittieri
429640	2249703	Las Playitas	7	2	1	0.0556093	6.23	0.869	10 YR 74	10 YR 63	0.1	71.5	25.2	2.9	0	0	0.3	1.4	1.35	5	42.34	NW	5	Granite	C Xeric B Termotropical E dry	1	0	0	0	0	0	0	0	0	0	0
432677	2245960	Aquiles Serdan (norte)	36	3	2	0.0095515	6.91	0.275	10 YR 63	10 YR 53	2.1	9.5	32.3	51.5	4.5	0.1	0	2.9	1.52	15	101.72	SW	22	Granite	C Xeric A Infratropical D semiarid	0	0	0	0	1	0	0	0	0	1	0
431402	2247260	Los Naranjos	35	4	3	0.208059	6.67	0.085	10 YR 64	10 YR 43	0.3	1.4	12.9	80.8	3.8	0.5	0.3	4	5.97	10	82.35	SW	15	Granite	C Xeric B Termotropical E dry	0	0	0	0	1	0	0	0	0	1	0
434345	2244358	Aquiles Serdan	6	5	4	0.0567141	6.28	1.144	10 YR 74	10 YR 46	0	9.8	75.1	14.1	0.4	0	0.6	2.6	4.37	10	68.71	SW	10	Granite	C Xeric A Infratropical D semiarid	0	0	0	0	1	0	0	0	0	1	0
439071	2239431	Mayto	5	6	5	0.06134	7.09	0.063	10 YR 84	10 YR 66	1.6	26.3	45.4	24.2	2	0	0.5	2.3	1.2	5	71.94	W	15	Granite-conglomerate	C Xeric A Infratropical D semiarid	0	0	0	1	0	1	1	0	0	1	0
442071	2236469	Las Villas	19	7	6	0.145355	7.12	0.144	10 YR 51	10 YR 31	0.8	15.9	65.3	17.5	0.2	0	0.3	30.1	2	10	69.6	SW	15	Granite-conglomerate	C Xeric A Infratropical D semiarid	0	0	0	0	0	0	0	0	0	1	0
443326	2232166	El Realito	8	8	7	0.087386	6.79	2.68	10 YR 73	10 YR 53	0	6.1	49.7	39.6	4.3	0	0.3	5.6	1.88	15	77.22	SW	10	Granite-conglomerate	C Xeric A Infratropical D semiarid	0	0	0	0	0	0	1	0	1	0	0
442967	2225189	El Coco	9	9	8	0.0729181	6.68	1.434	10 YR 63	10 YR 43	0.4	12	66.5	20.5	0.2	0	0.4	5.4	1.18	20	93.39	W	17	Granite	C Xeric A Infratropical D semiarid	0	0	0	0	1	1	0	0	0	1	0
442989	2222873	Las Peñitas (San Carlos)	10	10	9	0.0486121	7.02	1.28	10 YR 74	10 YR 34	0.5	43.9	44	11	0.1	0.1	0.4	2.5	1.67	5	65.14	NW	20	Granite	C Xeric A Infratropical D semiarid	0	0	1	0	1	0	1	0	0	1	0
449029	2209930	Playón de Mismaloya	12	12	10	0.0643897	6.86	1.301	10 YR 73	10 YR 42	0.1	60	17.5	20.5	0.7	0.2	1	5.4	2.27	5	46.52	SW	20	Sandstone-Conglomerate	C Xeric A Infratropical D semiarid	1	0	0	0	1	0	1	0	0	0	0
453938	2202947	La Gloria (norte)	18	13	11	0.138652	6.99	0.169	10 YR 62	10 YR 42	0	1.1	21.6	72.5	4.2	0.3	0.3	5.1	2.87	15	68.35	SW	10	Sandstone-Conglomerate	C Xeric A Infratropical D semiarid	0	0	0	0	1	0	0	1	1	0	0
455896	2200164	La Gloria (sur)	17	14	12	0.111219	7.24	0.266	10 YR 62	10 YR 41	0.1	0.1	3	90.9	5.7	0.1	0.1	3.9	3.09	10	104.45	SW	13	Sandstone-Conglomerate	C Xeric A Infratropical D semiarid	0	0	1	0	1	0	1	1	1	0	0
457902	2197329	La Limonera	16	15	13	0.088828	7.22	0.148	10 YR 62	10 YR 42	0	0.1	6.2	89.7	3.7	0.1	0.2	3.5	3.75	20	72.53	SW	13	Sandstone-Conglomerate	C Xeric A Infratropical D semiarid	0	0	0	0	1	0	1	1	1	1	0
465622	2186656	Las Peñitas	15	16	14	0.0717305	7.05	2.91	10 YR 61	10 YR 31	0.1	1.2	68.3	26.9	2.4	0.1	1	11.1	4.96	15	98.93	W	10	Sandstone-Conglomerate	C Xeric A Infratropical D semiarid	0	0	0	0	1	0	0	0	0	0	1
472818	2176885	Chalacatepec (norte)	13	17	15	0.0399805	7.13	2.34	10 YR 31	10 YR 71	0	0	54.6	38.9	5.6	0.4	0.5	17	4.32	30	77.67	W	10	Granite	C Xeric A Infratropical D semiarid	0	0	1	0	0	0	0	0	0	0	1
476466	2172805	Chalacatepec (sur)	14	18	16	0.0489362	7.04	2.14	10 YR 62	10 YR 41	0.2	38.9	47.1	11.9	1.6	0.1	0.2	14.6	2.74	50	68.68	SW	8	Volcanoclast	C Xeric A Infratropical D semiarid	1	1	0	0	1	1	0	1	0	1	0
479154	2170329	La Soledad	33	19	17	0.0187909	7.3	1.01	10 YR 72	10 YR 52	0	0.1	4.4	90.9	4.5	0.1	0	10.7	2.99	40	120.53	SW	10	Acid tuff	C Xeric A Infratropical D semiarid	1	1	0	0	1	0	0	0	0	1	0
481975	2169160	Chachalacas	32	20	18	0.0277331	8.34	4.04	10 YR 74	10 YR 52	0	0	0	89.8	10	0.1	0.1	6	2.98	50	73.75	S	10	Acid tuff	C Xeric A Infratropical D semiarid	0	1	0	0	1	0	1	0	0	0	1
489140	2164743	Chamela (norte)	31	21	19	0.0834677	8.22	0.191	10 YR 64	10 YR 44	0.3	3.8	27.5	59.1	9	0.2	0.1	5.5	4.75	50	40.83	SW	10	Volcanoclast	C Xeric A Infratropical D semiarid	0	0	0	0	1	1	1	0	1	0	0
491159	2161117	Chamela (sur)	30	22	20	0.272467	8.07	1.002	10 YR 64	10 YR 43	0.4	4.3	19.7	67.6	6.5	0.9	0.6	23.1	3.53	10	35.72	W	10	Acid tuff	C Xeric A Infratropical D semiarid	0	0	0	0	0	1	0	0	0	1	0
504307	2137365	Playa Chica	25	23	21	0.0312041	8.12	0.112	10 YR 52	10 YR 31	0	0.1	4.2	75	18.8	1.4	0.5	22.5	3.35	60	83.24	SW	7	Sandstone-Conglomerate	C Xeric A Infratropical D semiarid	0	1	0	0	1	0	1	0	0	1	0
506840	2135156	El Tecuan (norte)	3	24	22	0.02348	7.87	0.108	10 YR 63	10 YR 43	0.1	1	28.7	64.6	5.3	0.2	0.1	22.8	3.54	40	63.19	S	7	Volcanoclast	C Xeric A Infratropical D semiarid	1	0	0	1	1	0	1	0	1	1	0
509409	2133845	El Tecuan (sur)	4	26	23	0	7.52	0.717	10 YR 63	10 YR 53	0	0.3	10.9	83.2	5.1	0.2	0.3	17.8	1.51	60	173.76	SW	7	Volcanoclast	C Xeric A Infratropical D semiarid	0	0	0	0	1	0	0	0	0	1	0
510601	2133475	Tenacatita (norte)	28	27	24	0.0380795	8.06	0.192	10 YR 72	10 YR 52	0	1.6	19.3	72.2	6.5	0.4	0	15.5	2.95	60	43.22	SW	8	Volcanoclast	C Xeric A Infratropical D semiarid	1	0	0	1	0	0	0	0	1	1	0
513728	2132783	Tenacatita (sur)	26	28	25	0.00945724	8.18	0.172	10 YR 53	10 YR 32	3.2	1.7	4	79.5	10.3	0.9	0.4	15.5	6.35	50	45.57	SE	5	Volcanoclast	C Xeric A Infratropical E dry	0	0	0	0	1	0	1	0	0	0	0
513273	2131785	Punta Tenacatita	27	29	26	0	8.66	0.322	10 YR 41	10 YR 31	0	8.6	72.2	19.1	0.1	0	0	33.8	1.46	60	36.5	W	5	Volcanoclast	C Xeric A Infratropical D semiarid	0	0	0	0	1	1	0	0	0	1	0
532685	2124256	Melaque (Laguna del Tule)	22	30	27	0.0866636	7.89	0.149	10 YR 63	10 YR 43	1.1	8.3	36.3	47.1	7	0.1	0.1	7.5	1.82	30	53.29	SW	10	Granite	C Xeric A Infratropical D semiarid	0	0	0	0	1	1	0	0	0	1	0
535168	2119965	Isla Navidad	1	31	28	0	7.57	0.054	10 YR 52	10 YR 41	0	0.2	17.4	70.7	11.2	0.5	0	19	3.18	50	55	SW	10	Granite	C Xeric A Infratropical E dry	0	0	0	1	1	1	0	0	1	1	0
540539	2118060	Rio Marabasco	2	32	29	0.181764	7.32	0.23	10 YR 62	10 YR 31	0.1	0.2	7	79.9	11.9	0.6	0.3	23.1	5.76	70	67.84	SW	12	Granite	C Xeric A Infratropical E dry	0	0	0	0	1	1	0	0	0	0	0
