# Supplementary material for: Relationship between the distribution of vegetation and the environment in the coastal embryo dunes of Jalisco, México
Source: PeerJ journal article supplement (doi:10.7717/peerj.13015), 2022-03-02

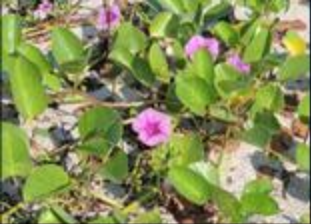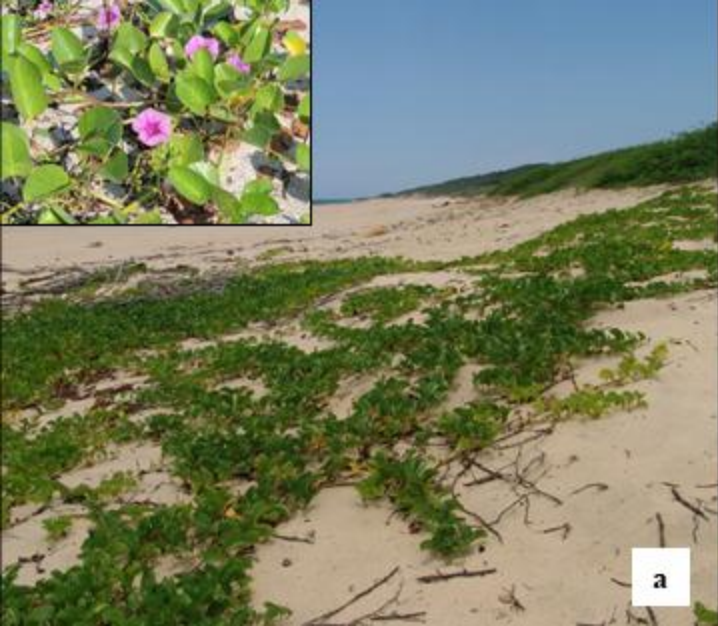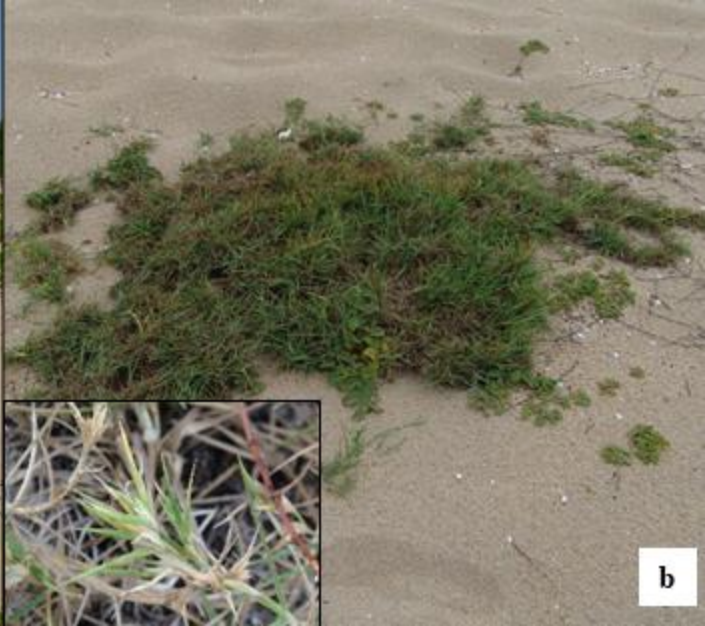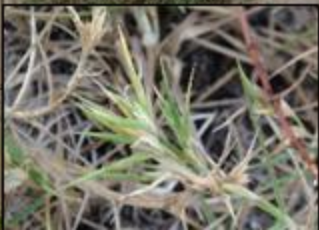

Supplement: Supplemental_Figure_S1.pdf [file Supplemental_Figure_S1.pdf]
